# Supplementary material for: Tobacco control within and beyond WHO MPOWER: outcomes from Taiwan SimSmoke
Source: PubMed Central journal article supplement — Tob Control. 2018 Nov 5;29(1):36–42. doi: 10.1136/tobaccocontrol-2018-054544 (PMC6952844; doi:10.1136/tobaccocontrol-2018-054544), 2018-11-05
Supplement: tobaccocontrol-2018-054544supp001.pdf [file tobaccocontrol-2018-054544supp001.pdf]

**Marketing bans**

|                                                                                                                    |      |      |      |      |      |      |      |      |      |      |      |      |      |      |      |      |      |
|--------------------------------------------------------------------------------------------------------------------|------|------|------|------|------|------|------|------|------|------|------|------|------|------|------|------|------|
| Ban on both direct advertising and indirect marketing strategies (brand stretching, sponsorship, and free samples) | 0%   | 0%   | 0%   | 0%   | 0%   | 0%   | 0%   | 0%   | 0%   | 0%   | 0%   | 0%   | 0%   | 0%   | 0%   | 0%   | 0%   |
| Total ban on direct advertising on all forms of media                                                              | 0%   | 0%   | 0%   | 0%   | 0%   | 0%   | 0%   | 0%   | 0%   | 100% | 100% | 100% | 100% | 100% | 100% | 100% | 100% |
| Partial ban on direct advertising                                                                                  | 100% | 100% | 100% | 100% | 100% | 100% | 100% | 100% | 100% | 0%   | 0%   | 0%   | 0%   | 0%   | 0%   | 0%   | 0%   |
| No restrictions                                                                                                    | 0%   | 0%   | 0%   | 0%   | 0%   | 0%   | 0%   | 0%   | 0%   | 0%   | 0%   | 0%   | 0%   | 0%   | 0%   | 0%   | 0%   |
| Enforcement [0-10]                                                                                                 | 7    | 7    | 7    | 7    | 7    | 7    | 7    | 7    | 7    | 8    | 8    | 8    | 8    | 8    | 8    | 8    | 8    |

**Health warnings**

|                             |      |      |      |      |      |      |      |      |      |      |      |      |      |      |      |      |      |
|-----------------------------|------|------|------|------|------|------|------|------|------|------|------|------|------|------|------|------|------|
| Very strong health warnings | 0%   | 0%   | 0%   | 0%   | 0%   | 0%   | 0%   | 0%   | 0%   | 0%   | 0%   | 0%   | 0%   | 0%   | 0%   | 0%   | 0%   |
| Strong health warnings      | 0%   | 0%   | 0%   | 0%   | 0%   | 0%   | 0%   | 0%   | 0%   | 100% | 100% | 100% | 100% | 100% | 100% | 100% | 100% |
| Mild health warnings        | 100% | 100% | 100% | 100% | 100% | 100% | 100% | 100% | 100% | 0%   | 0%   | 0%   | 0%   | 0%   | 0%   | 0%   | 0%   |
| No warnings                 | 0%   | 0%   | 0%   | 0%   | 0%   | 0%   | 0%   | 0%   | 0%   | 0%   | 0%   | 0%   | 0%   | 0%   | 0%   | 0%   | 0%   |

**Youth access**

**enforcement**

|                                    |      |      |      |      |      |      |      |      |      |      |      |      |      |      |      |      |      |
|------------------------------------|------|------|------|------|------|------|------|------|------|------|------|------|------|------|------|------|------|
| Vending machine ban                | 100% | 100% | 100% | 100% | 100% | 100% | 100% | 100% | 100% | 100% | 100% | 100% | 100% | 100% | 100% | 100% | 100% |
| Self-service ban                   | 100% | 100% | 100% | 100% | 100% | 100% | 100% | 100% | 100% | 100% | 100% | 100% | 100% | 100% | 100% | 100% | 100% |
| Strongly enforced                  | 0%   | 0%   | 0%   | 0%   | 0%   | 0%   | 0%   | 0%   | 0%   | 0%   | 0%   | 0%   | 0%   | 0%   | 0%   | 0%   | 0%   |
| Well enforced                      | 0%   | 0%   | 0%   | 0%   | 0%   | 0%   | 0%   | 0%   | 0%   | 100% | 100% | 100% | 100% | 100% | 100% | 100% | 100% |
| Low enforced                       | 100% | 100% | 100% | 100% | 100% | 100% | 100% | 100% | 100% | 0%   | 0%   | 0%   | 0%   | 0%   | 0%   | 0%   | 0%   |
| Community based publicity campaign | 50%  | 50%  | 50%  | 50%  | 50%  | 50%  | 50%  | 50%  | 50%  | 70%  | 70%  | 70%  | 70%  | 70%  | 70%  | 70%  | 70%  |
| Merchant awareness campaign        | 50%  | 50%  | 50%  | 50%  | 50%  | 50%  | 50%  | 50%  | 50%  | 70%  | 70%  | 70%  | 70%  | 70%  | 80%  | 80%  | 90%  |

**Cessation -**

**pharmacotherapy**

|                         |   |   |   |   |   |   |   |   |   |   |   |   |   |   |   |   |   |
|-------------------------|---|---|---|---|---|---|---|---|---|---|---|---|---|---|---|---|---|
| NRT                     |   |   |   |   |   |   |   |   |   |   |   |   |   |   |   |   |   |
| [2=provided without Rx; | 2 | 2 | 2 | 2 | 2 | 2 | 2 | 2 | 2 | 2 | 2 | 2 | 2 | 2 | 2 | 2 | 2 |
| 1=provided with Rx;     |   |   |   |   |   |   |   |   |   |   |   |   |   |   |   |   |   |
| 0=otherwise]            |   |   |   |   |   |   |   |   |   |   |   |   |   |   |   |   |   |

|                         |   |   |   |   |   |   |   |   |   |   |   |   |   |   |   |   |   |
|-------------------------|---|---|---|---|---|---|---|---|---|---|---|---|---|---|---|---|---|
| Bupropion and           |   |   |   |   |   |   |   |   |   |   |   |   |   |   |   |   |   |
| Varenicline             |   |   |   |   |   |   |   |   |   |   |   |   |   |   |   |   |   |
| [2=provided without Rx; | 1 | 1 | 1 | 1 | 1 | 1 | 1 | 1 | 1 | 1 | 1 | 1 | 1 | 1 | 1 | 1 | 1 |
| 1=one provided with Rx; |   |   |   |   |   |   |   |   |   |   |   |   |   |   |   |   |   |
| 0=otherwise]            |   |   |   |   |   |   |   |   |   |   |   |   |   |   |   |   |   |

**Cessation - financial coverage**  
**[0=None; 1=Yes in some; 2=Yes in most]**

|                                 |   |   |   |   |   |   |   |   |   |   |   |   |   |   |   |   |   |
|---------------------------------|---|---|---|---|---|---|---|---|---|---|---|---|---|---|---|---|---|
| Primary care facilities         | 1 | 1 | 1 | 1 | 1 | 1 | 1 | 1 | 1 | 1 | 1 | 1 | 1 | 1 | 1 | 1 | 1 |
| Hospitals                       | 1 | 1 | 1 | 1 | 1 | 1 | 1 | 1 | 1 | 1 | 1 | 1 | 1 | 1 | 1 | 1 | 1 |
| Offices of health professionals | 1 | 1 | 1 | 1 | 1 | 1 | 1 | 1 | 1 | 1 | 1 | 1 | 1 | 1 | 1 | 1 | 1 |
| Community                       | 1 | 1 | 1 | 1 | 1 | 1 | 1 | 1 | 1 | 1 | 1 | 1 | 1 | 1 | 1 | 1 | 1 |
| Other                           | 1 | 1 | 1 | 1 | 1 | 1 | 1 | 1 | 1 | 1 | 1 | 1 | 1 | 1 | 1 | 1 | 1 |

|                              |   |   |   |   |   |   |   |   |   |   |   |   |   |   |   |   |   |
|------------------------------|---|---|---|---|---|---|---|---|---|---|---|---|---|---|---|---|---|
| <b>Cessation – quit-line</b> |   |   |   |   |   |   |   |   |   |   |   |   |   |   |   |   |   |
| Quit-line                    | 0 | 0 | 0 | 1 | 1 | 1 | 1 | 1 | 1 | 1 | 1 | 1 | 1 | 1 | 1 | 1 | 1 |
| [0=None; 1=Yes]              |   |   |   |   |   |   |   |   |   |   |   |   |   |   |   |   |   |

|                                    |   |   |   |   |   |   |   |   |   |   |   |   |   |   |   |   |   |
|------------------------------------|---|---|---|---|---|---|---|---|---|---|---|---|---|---|---|---|---|
| Quit-line type                     |   |   |   |   |   |   |   |   |   |   |   |   |   |   |   |   |   |
| [0=None; 1=Passive;                | 0 | 0 | 0 | 3 | 3 | 3 | 3 | 3 | 3 | 3 | 3 | 3 | 3 | 3 | 3 | 3 | 3 |
| 2=Active; 3=Active with follow up] |   |   |   |   |   |   |   |   |   |   |   |   |   |   |   |   |   |

|               |   |   |   |   |   |   |   |   |   |   |   |   |   |   |   |   |   |
|---------------|---|---|---|---|---|---|---|---|---|---|---|---|---|---|---|---|---|
| Free NRT      | 1 | 1 | 1 | 1 | 1 | 1 | 1 | 1 | 1 | 1 | 1 | 1 | 1 | 1 | 1 | 1 | 1 |
| [2=Yes; 1=No] |   |   |   |   |   |   |   |   |   |   |   |   |   |   |   |   |   |

|                                                                       |   |   |   |   |   |   |   |   |   |     |     |     |     |     |     |     |     |
|-----------------------------------------------------------------------|---|---|---|---|---|---|---|---|---|-----|-----|-----|-----|-----|-----|-----|-----|
| <b>Cessation - brief interventions</b>                                |   |   |   |   |   |   |   |   |   |     |     |     |     |     |     |     |     |
| Health care provider involvement                                      |   |   |   |   |   |   |   |   |   |     |     |     |     |     |     |     |     |
| [0=None; 1=required or adequately subsidized intervention with follow | 0 | 0 | 0 | 0 | 0 | 0 | 0 | 0 | 0 | 0.1 | 0.1 | 0.1 | 0.1 | 0.2 | 0.2 | 0.2 | 0.2 |

up by health care  
providers and with  
training and reminder  
systems]

## Appendix B Taiwan SimSmoke sources of data

Table B-1 Full list of data sources used in Taiwan SimSmoke.

| Module     | Data                                                                                                | Source                                                                                                                                                                                                                                                                                                                                                                                                                                                                                                                                                                                                                                                                                                                                                       |
|------------|-----------------------------------------------------------------------------------------------------|--------------------------------------------------------------------------------------------------------------------------------------------------------------------------------------------------------------------------------------------------------------------------------------------------------------------------------------------------------------------------------------------------------------------------------------------------------------------------------------------------------------------------------------------------------------------------------------------------------------------------------------------------------------------------------------------------------------------------------------------------------------|
| Population | Population                                                                                          | Department of Household Registration, Ministry of the Interior, Taiwan. Statistics 2017 [Available from: <a href="http://www.ris.gov.tw/en/web/ris3-english/history">http://www.ris.gov.tw/en/web/ris3-english/history</a> ]                                                                                                                                                                                                                                                                                                                                                                                                                                                                                                                                 |
|            | Fertility Rates                                                                                     | Department of Household Registration, Ministry of the Interior, Taiwan. Statistics 2017 [Available from: <a href="http://www.ris.gov.tw/en/web/ris3-english/history">http://www.ris.gov.tw/en/web/ris3-english/history</a> ]                                                                                                                                                                                                                                                                                                                                                                                                                                                                                                                                 |
|            | Mortality Rates                                                                                     | Department of Household Registration, Ministry of the Interior, Taiwan. [Demographics] 2017 [Available from: <a href="http://www.ris.gov.tw/346">http://www.ris.gov.tw/346</a> ]                                                                                                                                                                                                                                                                                                                                                                                                                                                                                                                                                                             |
| Smoking    | Smoking Rates by Age, Gender, and Smoking Status                                                    | Chang Y-H, Fu Y-C. 2000 Taiwan Social Change Survey (Round 4, Year 1): Interpersonal Relations, Leisure, Family, Life Experiences, Mental Health (C00108_2)[Data file]. Taipei City (Taiwan): Survey Research Data Archive, Center for Survey Research, Research Center for Humanities and Social Sciences, Academia Sinica, 2001<br>Wen C-P, Levy DT, Cheng T-Y, et al. Smoking behaviour in Taiwan, 2001. <i>Tob Control</i> 2005;14(Suppl 1):i51-i55. doi: 10.1136/tc.2004.008011<br>GBD 2015. Global Burden of Disease Study 2015 Smoking Prevalence 1980-2015. Seattle (United States of America): Institute for Health Metrics and Evaluation (IHME), 2017                                                                                             |
|            | First Year Cessation Rates by Age and Gender                                                        | GBD 2015. Global Burden of Disease Study 2015 Smoking Prevalence 1980-2015. Seattle (United States of America): Institute for Health Metrics and Evaluation (IHME), 2017                                                                                                                                                                                                                                                                                                                                                                                                                                                                                                                                                                                     |
|            | Relapse Rates by Age, Gender, and Years Since Quitting                                              | Gilpin EA, Pierce JP, Farkas AJ. Duration of Smoking Abstinence and Success in Quitting. <i>J Natl Cancer Inst</i> 1997;89(8):572-76. doi: 10.1093/jnci/89.8.572<br>Hughes JR, Keely J, Naud S. Shape of the relapse curve and long-term abstinence among untreated smokers. <i>Addiction</i> 2004;99(1):29-38. doi: 10.1111/j.1360-0443.2004.00540.x<br>U.S. Department of Health and Human Services. The Health Benefits of Smoking Cessation - a report of the Surgeon General. DHHS Publication No (CDC) 90-8416. Rockville (United States of America): U.S. Department of Health and Human Services, Public Health Service, Centers for Disease Control, Center for Chronic Disease Prevention and Health Promotion, Office of Smoking and Health, 1990 |
| Policy     | Relative Risks of Mortality from Smoking by Age and Gender                                          | Wen C-P, Tsai S-P, Chen C-J, et al. The mortality risks of smokers in Taiwan Part I: cause-specific mortality. <i>Prev Med</i> 2004;39(3):528-35. doi: 10.1016/j.ypmed.2004.02.010                                                                                                                                                                                                                                                                                                                                                                                                                                                                                                                                                                           |
|            | Taxation                                                                                            | Levy DT, Wen C-P, Cheng T-Y, et al. Increasing taxes to reduce smoking prevalence and smoking attributable mortality in Taiwan: results from a tobacco policy simulation model. <i>Tob Control</i> 2005;14(suppl 1):i45-i50. doi: 10.1136/tc.2003.005660<br>Directorate-General of Budget, Accounting and Statistics, Executive Yuan, Taiwan. Consumer Price Index 2017 [Available from: <a href="https://eng.stat.gov.tw/ct.asp?xItem=12092&amp;ctNode=1558&amp;mp=5">https://eng.stat.gov.tw/ct.asp?xItem=12092&amp;ctNode=1558&amp;mp=5</a> ]                                                                                                                                                                                                             |
|            | Clean air laws<br>Mass media campaigns<br>Advertising bans<br>Youth access enforcement<br>Cessation | Tobacco Control Reports annually released by the Health Promotion Administration<br>Public Health Experts, Scholars, and Anti-Smoking Non-Governmental Organizations in Taiwan                                                                                                                                                                                                                                                                                                                                                                                                                                                                                                                                                                               |

## Appendix C Taiwan SimSmoke Key Assumptions and Limitations

Table C-1 Taiwan SimSmoke Assumptions and Limits.

| Key Assumptions                                                                | Limitations                                                                                                              |
|--------------------------------------------------------------------------------|--------------------------------------------------------------------------------------------------------------------------|
| Dynamic Simulation Model                                                       | E-Cigarette Use Not Considered                                                                                           |
| Yearly Time Step                                                               | Constant Mortality Rates                                                                                                 |
| Estimates by age and gender                                                    | Net Migration Not Considered                                                                                             |
| First-Order Markov Processes                                                   | Consumption Not Considered                                                                                               |
| Population divided in Current, Never, and Former Smokers by Years of Cessation | No Taiwan Data available for Yearly Cessation Rate, Relapse Rate, and Percentage of Former Smokers by Years of Cessation |
| Tobacco Control Policies affect Cessation and Relapse Rates                    | Smuggling and Duty Free Purchase Not Considered                                                                          |
| Smoking Attributable Mortality is estimated from Relative Risks                |                                                                                                                          |
| No Formers Smokers before age 30                                               |                                                                                                                          |
